# Supplementary material for: Crosslinking substrate regulates frictional properties of tissue-engineered cartilage and chondrocyte response to loading
Source: Springer Nature journal article supplement (doi:10.1038/s43246-025-00781-8), 2025-03-27
Supplement: MOESM2 [file 43246_2025_781_MOESM2_ESM.pdf]

## DESCRIPTION OF SUPPLEMENTARY DATA

*Crosslinking substrate regulates frictional properties of tissue-engineered articular cartilage and chondrocyte response to loading* Christoph Meinert, Angus Weekes, Chun-Wei Chang,

Karsten Schrobback, Amy Gelmi, Molly M. Stevens, Dietmar W. Hutmacher, Travis J. Klein

Queensland University of Technology (QUT), Brisbane, Australia

**Supplementary Data – Video SV1** – Video of GelMA-HAMA hydrogel crosslinked between PTFE and glass substrates, demonstrating the frictional properties of the different surfaces.

**Supplementary Data** – Figures S1-S4.
